# Supplementary material
Source: Springer Nature journal article supplement (https://www.springermedizin.de/resource/supplementary/12884_2012_607_MOESM3_ESM.pdf/9457810)
Supplement: MOESM3 [file 9457810]

# Kick count form, page 1

I started to count today (dd.mm.yy)    .    .

Due date by ultrasound (dd.mm.yy)    .    .

I usually count between (hours)    .    and (hours)    .

## How to complete the kick count form

Use a blue or black pen.  
For your convenience, fill in weekday and date in the appropriate box.

After counting 10 kicks/movements, record the number of minutes in the appropriate 5-minutes box on the kick count form.

**Examples:**  
If it took 7 minutes, write 7 in the 6-10-minutes box.  
If it took 1 hour and 5 minutes, write 65 in the 60-65 minutes box.

| Week 24                                  |    |    |    |    |    |    |    |
|------------------------------------------|----|----|----|----|----|----|----|
| Date:                                    | We | Th | Fr | Sa | Su | Mo | Tu |
| Date: 7/3/13                             |    |    |    |    |    |    |    |
| Minutes:                                 |    |    |    |    |    |    |    |
| 0-5                                      |    |    |    |    |    |    |    |
| 6-10                                     | 7  |    |    |    |    |    |    |
| 11-15                                    |    |    |    |    |    |    |    |
| 16-20                                    |    |    |    |    |    |    |    |
| 21-25                                    |    |    |    |    |    |    |    |
| 26-30                                    |    |    |    |    |    |    |    |
| 31-35                                    |    |    |    |    |    |    |    |
| 36-40                                    |    |    |    |    |    |    |    |
| 41-45                                    |    |    |    |    |    |    |    |
| 46-50                                    |    |    |    |    |    |    |    |
| 51-55                                    |    |    |    |    |    |    |    |
| 56-60                                    |    |    |    |    |    |    |    |
| 61-65                                    | 65 |    |    |    |    |    |    |
| 66-70                                    |    |    |    |    |    |    |    |
| 71-75                                    |    |    |    |    |    |    |    |
| 76-80                                    |    |    |    |    |    |    |    |
| 81-85                                    |    |    |    |    |    |    |    |
| 86-90                                    |    |    |    |    |    |    |    |
| 91-95                                    |    |    |    |    |    |    |    |
| 96-100                                   |    |    |    |    |    |    |    |
| 101-105                                  |    |    |    |    |    |    |    |
| 106-110                                  |    |    |    |    |    |    |    |
| 111-115                                  |    |    |    |    |    |    |    |
| 116-120                                  |    |    |    |    |    |    |    |
| More than 2h?<br>Record exact no of min. |    |    |    |    |    |    |    |

Fill in your study number if you are participating in *Count with me*.

|                                          | Week 24 | Week 25 | Week 26 | Week 27 | Week 28 |
|------------------------------------------|---------|---------|---------|---------|---------|
| Weekday:                                 |         |         |         |         |         |
| Date:                                    |         |         |         |         |         |
| Minutes:                                 |         |         |         |         |         |
| 0-5                                      |         |         |         |         |         |
| 6-10                                     |         |         |         |         |         |
| 11-15                                    |         |         |         |         |         |
| 16-20                                    |         |         |         |         |         |
| 21-25                                    |         |         |         |         |         |
| 26-30                                    |         |         |         |         |         |
| 31-35                                    |         |         |         |         |         |
| 36-40                                    |         |         |         |         |         |
| 41-45                                    |         |         |         |         |         |
| 46-50                                    |         |         |         |         |         |
| 51-55                                    |         |         |         |         |         |
| 56-60                                    |         |         |         |         |         |
| 61-65                                    |         |         |         |         |         |
| 66-70                                    |         |         |         |         |         |
| 71-75                                    |         |         |         |         |         |
| 76-80                                    |         |         |         |         |         |
| 81-85                                    |         |         |         |         |         |
| 86-90                                    |         |         |         |         |         |
| 91-95                                    |         |         |         |         |         |
| 96-100                                   |         |         |         |         |         |
| 101-105                                  |         |         |         |         |         |
| 106-110                                  |         |         |         |         |         |
| 111-115                                  |         |         |         |         |         |
| 116-120                                  |         |         |         |         |         |
| More than 2h?<br>Record exact no of min. |         |         |         |         |         |



|                                             | Week 36 |  |  |  | Week 37 |  |  |  | Week 38 |  |  |  | Week 39 |  |  |  | Week 40 |  |  |  | Week 41 |  |  |  | Week 42 |  |  |  |  |  |  |  |  |  |  |  |
|---------------------------------------------|---------|--|--|--|---------|--|--|--|---------|--|--|--|---------|--|--|--|---------|--|--|--|---------|--|--|--|---------|--|--|--|--|--|--|--|--|--|--|--|
| Weekday:                                    |         |  |  |  |         |  |  |  |         |  |  |  |         |  |  |  |         |  |  |  |         |  |  |  |         |  |  |  |  |  |  |  |  |  |  |  |
| Date:                                       |         |  |  |  |         |  |  |  |         |  |  |  |         |  |  |  |         |  |  |  |         |  |  |  |         |  |  |  |  |  |  |  |  |  |  |  |
| Minutes:                                    |         |  |  |  |         |  |  |  |         |  |  |  |         |  |  |  |         |  |  |  |         |  |  |  |         |  |  |  |  |  |  |  |  |  |  |  |
| 0-5                                         |         |  |  |  |         |  |  |  |         |  |  |  |         |  |  |  |         |  |  |  |         |  |  |  |         |  |  |  |  |  |  |  |  |  |  |  |
| 6-10                                        |         |  |  |  |         |  |  |  |         |  |  |  |         |  |  |  |         |  |  |  |         |  |  |  |         |  |  |  |  |  |  |  |  |  |  |  |
| 11-15                                       |         |  |  |  |         |  |  |  |         |  |  |  |         |  |  |  |         |  |  |  |         |  |  |  |         |  |  |  |  |  |  |  |  |  |  |  |
| 16-20                                       |         |  |  |  |         |  |  |  |         |  |  |  |         |  |  |  |         |  |  |  |         |  |  |  |         |  |  |  |  |  |  |  |  |  |  |  |
| 21-25                                       |         |  |  |  |         |  |  |  |         |  |  |  |         |  |  |  |         |  |  |  |         |  |  |  |         |  |  |  |  |  |  |  |  |  |  |  |
| 26-30                                       |         |  |  |  |         |  |  |  |         |  |  |  |         |  |  |  |         |  |  |  |         |  |  |  |         |  |  |  |  |  |  |  |  |  |  |  |
| 31-35                                       |         |  |  |  |         |  |  |  |         |  |  |  |         |  |  |  |         |  |  |  |         |  |  |  |         |  |  |  |  |  |  |  |  |  |  |  |
| 36-40                                       |         |  |  |  |         |  |  |  |         |  |  |  |         |  |  |  |         |  |  |  |         |  |  |  |         |  |  |  |  |  |  |  |  |  |  |  |
| 41-45                                       |         |  |  |  |         |  |  |  |         |  |  |  |         |  |  |  |         |  |  |  |         |  |  |  |         |  |  |  |  |  |  |  |  |  |  |  |
| 46-50                                       |         |  |  |  |         |  |  |  |         |  |  |  |         |  |  |  |         |  |  |  |         |  |  |  |         |  |  |  |  |  |  |  |  |  |  |  |
| 51-55                                       |         |  |  |  |         |  |  |  |         |  |  |  |         |  |  |  |         |  |  |  |         |  |  |  |         |  |  |  |  |  |  |  |  |  |  |  |
| 56-60                                       |         |  |  |  |         |  |  |  |         |  |  |  |         |  |  |  |         |  |  |  |         |  |  |  |         |  |  |  |  |  |  |  |  |  |  |  |
| 61-65                                       |         |  |  |  |         |  |  |  |         |  |  |  |         |  |  |  |         |  |  |  |         |  |  |  |         |  |  |  |  |  |  |  |  |  |  |  |
| 66-70                                       |         |  |  |  |         |  |  |  |         |  |  |  |         |  |  |  |         |  |  |  |         |  |  |  |         |  |  |  |  |  |  |  |  |  |  |  |
| 71-75                                       |         |  |  |  |         |  |  |  |         |  |  |  |         |  |  |  |         |  |  |  |         |  |  |  |         |  |  |  |  |  |  |  |  |  |  |  |
| 76-80                                       |         |  |  |  |         |  |  |  |         |  |  |  |         |  |  |  |         |  |  |  |         |  |  |  |         |  |  |  |  |  |  |  |  |  |  |  |
| 81-85                                       |         |  |  |  |         |  |  |  |         |  |  |  |         |  |  |  |         |  |  |  |         |  |  |  |         |  |  |  |  |  |  |  |  |  |  |  |
| 86-90                                       |         |  |  |  |         |  |  |  |         |  |  |  |         |  |  |  |         |  |  |  |         |  |  |  |         |  |  |  |  |  |  |  |  |  |  |  |
| 91-95                                       |         |  |  |  |         |  |  |  |         |  |  |  |         |  |  |  |         |  |  |  |         |  |  |  |         |  |  |  |  |  |  |  |  |  |  |  |
| 96-100                                      |         |  |  |  |         |  |  |  |         |  |  |  |         |  |  |  |         |  |  |  |         |  |  |  |         |  |  |  |  |  |  |  |  |  |  |  |
| 101-105                                     |         |  |  |  |         |  |  |  |         |  |  |  |         |  |  |  |         |  |  |  |         |  |  |  |         |  |  |  |  |  |  |  |  |  |  |  |
| 106-110                                     |         |  |  |  |         |  |  |  |         |  |  |  |         |  |  |  |         |  |  |  |         |  |  |  |         |  |  |  |  |  |  |  |  |  |  |  |
| 111-115                                     |         |  |  |  |         |  |  |  |         |  |  |  |         |  |  |  |         |  |  |  |         |  |  |  |         |  |  |  |  |  |  |  |  |  |  |  |
| 116-120                                     |         |  |  |  |         |  |  |  |         |  |  |  |         |  |  |  |         |  |  |  |         |  |  |  |         |  |  |  |  |  |  |  |  |  |  |  |
| More than 2h?<br>Record exact<br>no of min. |         |  |  |  |         |  |  |  |         |  |  |  |         |  |  |  |         |  |  |  |         |  |  |  |         |  |  |  |  |  |  |  |  |  |  |  |

## HAVE YOU CONTACTED HEALTH CARE PERSONNEL DUE TO DECREASED FETAL ACTIVITY?

If so, please complete the questions below. Should you contact health care personnel on several occasions, please complete the questionnaire each time (use an extra sheet of paper if necessary).

dd mm yy

1. Have you **CONTACTED** health care personnel because you have been worried about decreased activity? If so, when:

2. What did you **DO**?

I waited for   hours before I **CALLED**:

- Antenatal care services/health clinic  
 Maternity unit  
 Other \_\_\_\_\_

I waited for   hours before I **VISITED**

- Antenatal care services/health clinic  
 Maternity unit  
 Other \_\_\_\_\_

3. If you were **EXAMINED**, how did you perceive the baby's activity level at that time?

The activity level was normal

The activity level was still decreased

dd mm yy

1. Have you **CONTACTED** health care personnel because you have been worried about decreased activity? If so, when:

2. What did you **DO**?

I waited for   hours before I **CALLED**:

Antenatal care services/health clinic  
 Maternity unit  
 Other \_\_\_\_\_

I waited for   hours before I **VISITED**

- Antenatal care services/health clinic  
 Maternity unit  
 Other \_\_\_\_\_

3. If you were **EXAMINED**, how did you perceive the baby's activity level at that time?

The activity level was normal

The activity level was still decreased

dd mm yy

1. Have you **CONTACTED** health care personnel because you have been worried about decreased activity? If so, when:

2. What did you **DO**?

I waited for   hours before I **CALLED**:

Antenatal care services/health clinic  
 Maternity unit  
 Other \_\_\_\_\_

I waited for   hours before I **VISITED**

- Antenatal care services/health clinic  
 Maternity unit  
 Other \_\_\_\_\_

3. If you were **EXAMINED**, how did you perceive the baby's activity level at that time?

The activity level was normal

The activity level was still decreased

dd mm yy

1. Have you **CONTACTED** health care personnel because you have been worried about decreased activity? If so, when:

2. What did you **DO**?

I waited for   hours before I **CALLED**:

Antenatal care services/health clinic  
 Maternity unit  
 Other \_\_\_\_\_

I waited for   hours before I **VISITED**

- Antenatal care services/health clinic  
 Maternity unit  
 Other \_\_\_\_\_

3. If you were **EXAMINED**, how did you perceive the baby's activity level at that time?

The activity level was normal

The activity level was still decreased
